# Supplementary material for: Inhibition of a Snake Venom Metalloproteinase by the Flavonoid Myricetin
Source: MDPI journal article supplement (doi:10.3390/molecules23102662), 2018-10-16
Supplement: s1 [file s1]

Article

# Inhibition of a Snake Venom Metalloproteinase by the Flavonoid Myricetin

Lina María Preciado <sup>1\*</sup>, Jeffrey Comer <sup>2</sup>, Vitelbina Núñez <sup>1,3</sup>, Paola Rey-Suárez <sup>1</sup>, Jaime Andrés Pereañez <sup>1\*</sup>

<sup>1</sup> Programa de Ofidismo/Escurpionismo, Facultad de Ciencias Farmacéuticas y Alimentarias, Universidad de Antioquia UdeA, Calle 70 No. 52-21, Medellín, Colombia.

<sup>2</sup> Institute of Computational Comparative Medicine, Kansas State University, Manhattan, Kansas, USA, 66506.

<sup>3</sup> Escuela de Microbiología, Universidad de Antioquia, UdeA, Calle 70 No. 52-21, Medellín, Colombia.

\* Correspondence: maria.preciado@udea.edu.co; jaime.pereanez@udea.edu.co; Tel.: +57 (4) 219 6536

Academic Editor: name

Version September 21, 2018 submitted to *Molecules*; Typeset by L<sup>A</sup>T<sub>E</sub>X using class file mdpi.cls

---

1 Video S2: Minimum free-energy conformation of myricetin bound to BaP1.

2 © 2018 by the authors. Submitted to *Molecules* for possible open access publication under the terms and  
3 conditions of the Creative Commons Attribution license (<http://creativecommons.org/licenses/by/4.0/>)

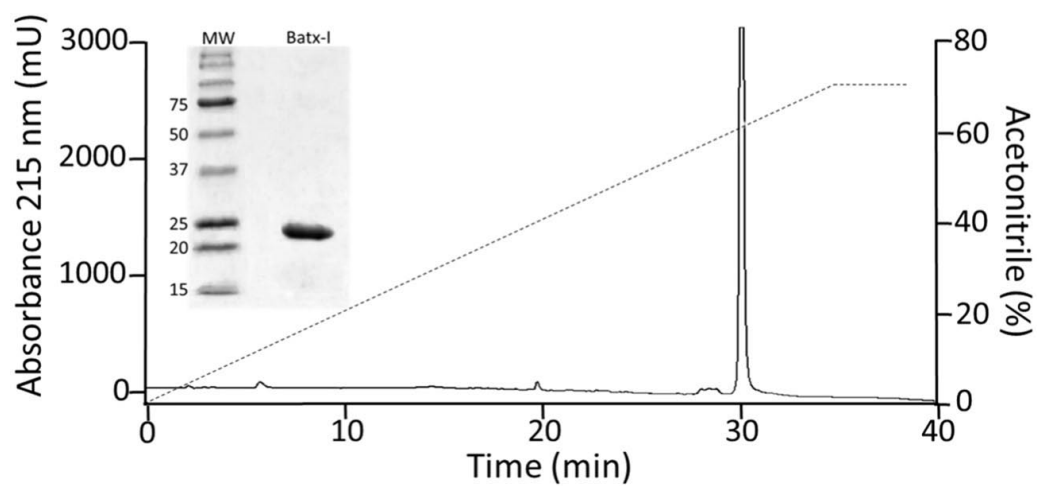

**Figure S1.** Purity of Batx-I isolated from *B. atrox* venom analyzed by SDS-PAGE under reduced conditions and reverse-phase high-performance liquid chromatography (RP-HPLC).
