# Supplementary figures and images for: Inhibition of a Snake Venom Metalloproteinase by the Flavonoid Myricetin
Source: MDPI journal article supplement (doi:10.3390/molecules23102662), 2018-10-16

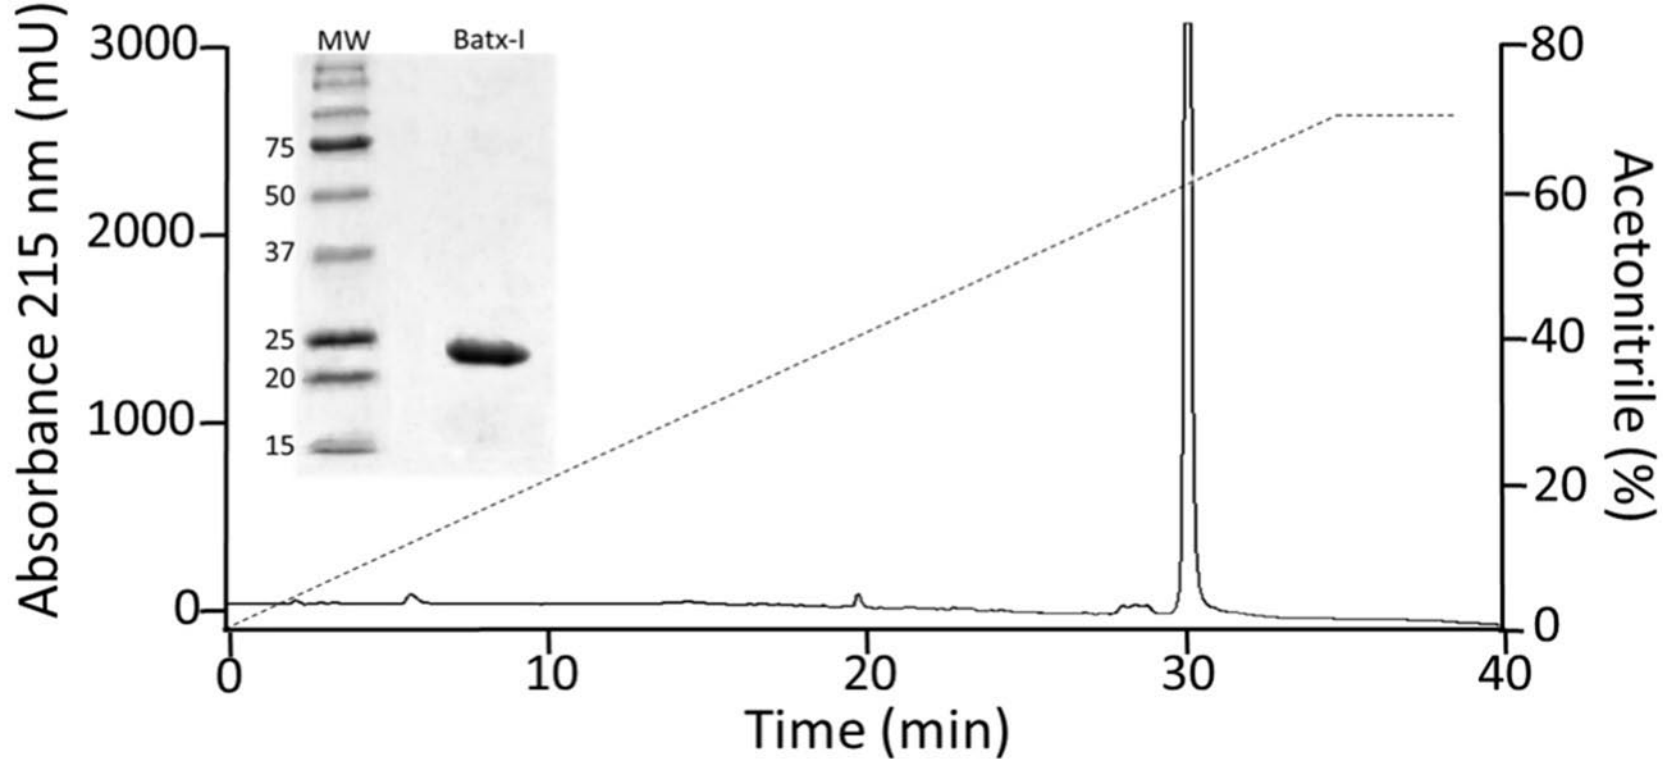

Supplement: s1 [file s1]
